# Supplementary material for: Nanoporous PdCr alloys as highly active electrocatalysts for oxygen reduction reaction
Source: Royal Society of Chemistry journal article supplement (doi:10.1039/c5cp07184d), 2016-01-01
Supplement: c5cp07184d1.pdf [file c5cp07184d1.pdf]

**Electronic supplementary information for:**

**Nanoporous PdCr alloys as highly active electrocatalysts  
for oxygen reduction reaction**

**Huimei Duan and Caixia Xu\***

\*chm\_xucx@ujn.edu.cn

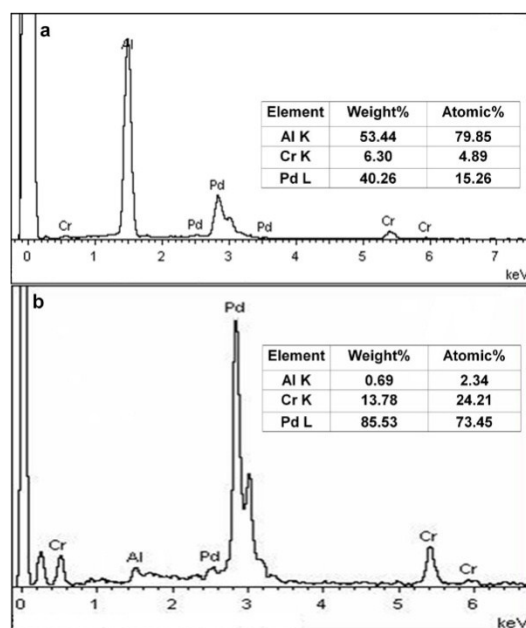

**Fig. S1** EDS data of the (a) PdCrAl alloy and (b) the resulted sample (NP-Pd<sub>75</sub>Cr<sub>25</sub>) after dealloying in 0.2 M NaOH solution at room temperature for 48 h.

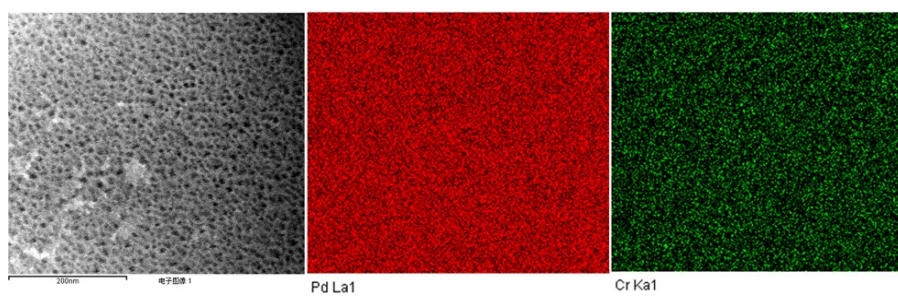

**Fig. S2.** SEM and High-resolution EDS elemental maps of NP-Pd<sub>75</sub>Cr<sub>25</sub> alloy.

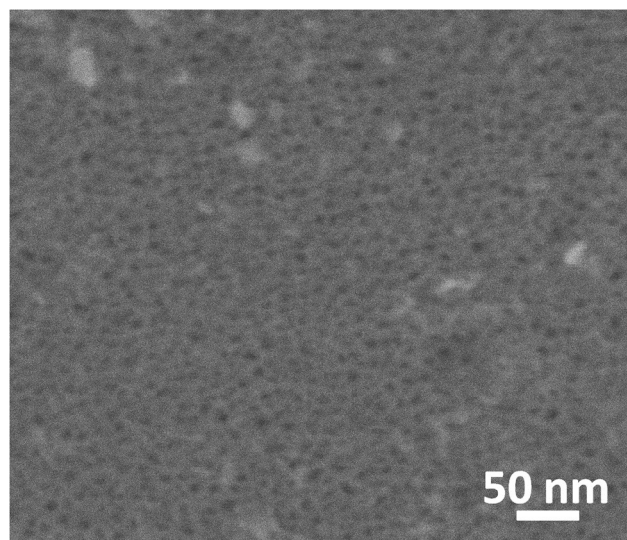

**Fig. S3** SEM image of the resulted sample (NP-Pd<sub>67</sub>Cr<sub>33</sub>) after dealloying in 0.2 M NaOH solution at room temperature for 48 h.

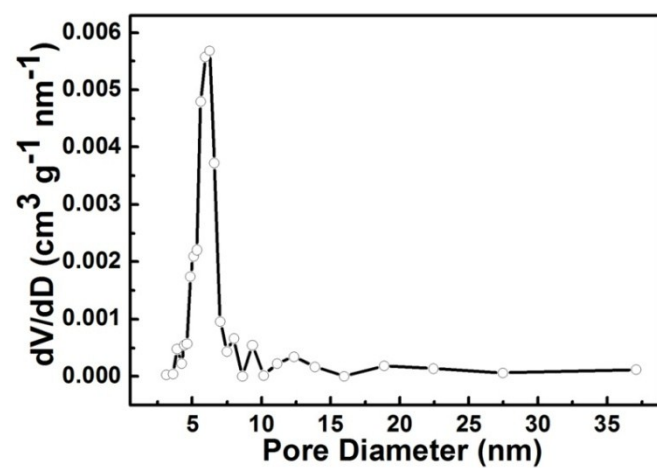

**Fig. S4** The pore size distribution of NP-Pd<sub>75</sub>Cr<sub>25</sub> alloy.

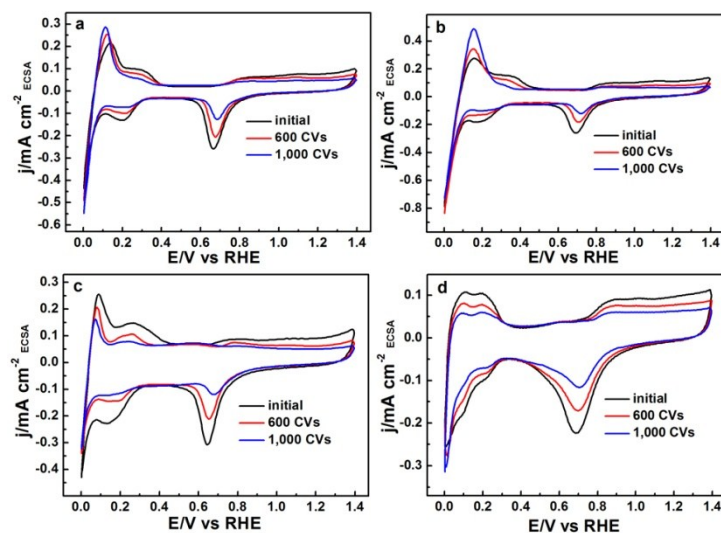

**Fig. S5** CV curves for NP-Pd<sub>75</sub>Cr<sub>25</sub> (a), NP-Pd<sub>67</sub>Cr<sub>33</sub> (b), NP-Pd (c), and Pt/C (d) catalysts

before and after 600 and 1, 000 potential cycles in 0.1 M HClO<sub>4</sub> solution from 0 to 1.4 V vs

RHE at room temperature with the scan rate at 50 mV s<sup>-1</sup>.

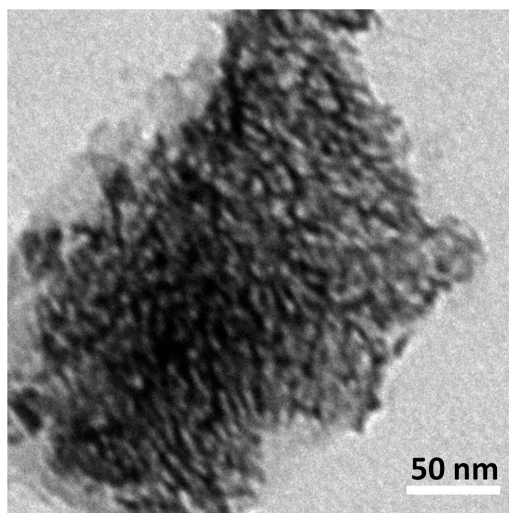

**Fig. S6** The TEM image of NP-Pd<sub>75</sub>Cr<sub>25</sub> alloy after 5,000 potential cycles.
